# Supplementary material for: mRNA profiling of mesenchymal stem cell-derived exosomes reveals their function in accelerating wound healing
Source: Research Square preprint supplement (doi:10.21203/rs.3.rs-8130672/v1), 2026-01-19
Supplement: Supplementary file 1 [file 0864f575fe2c65e8279ad10f.docx]

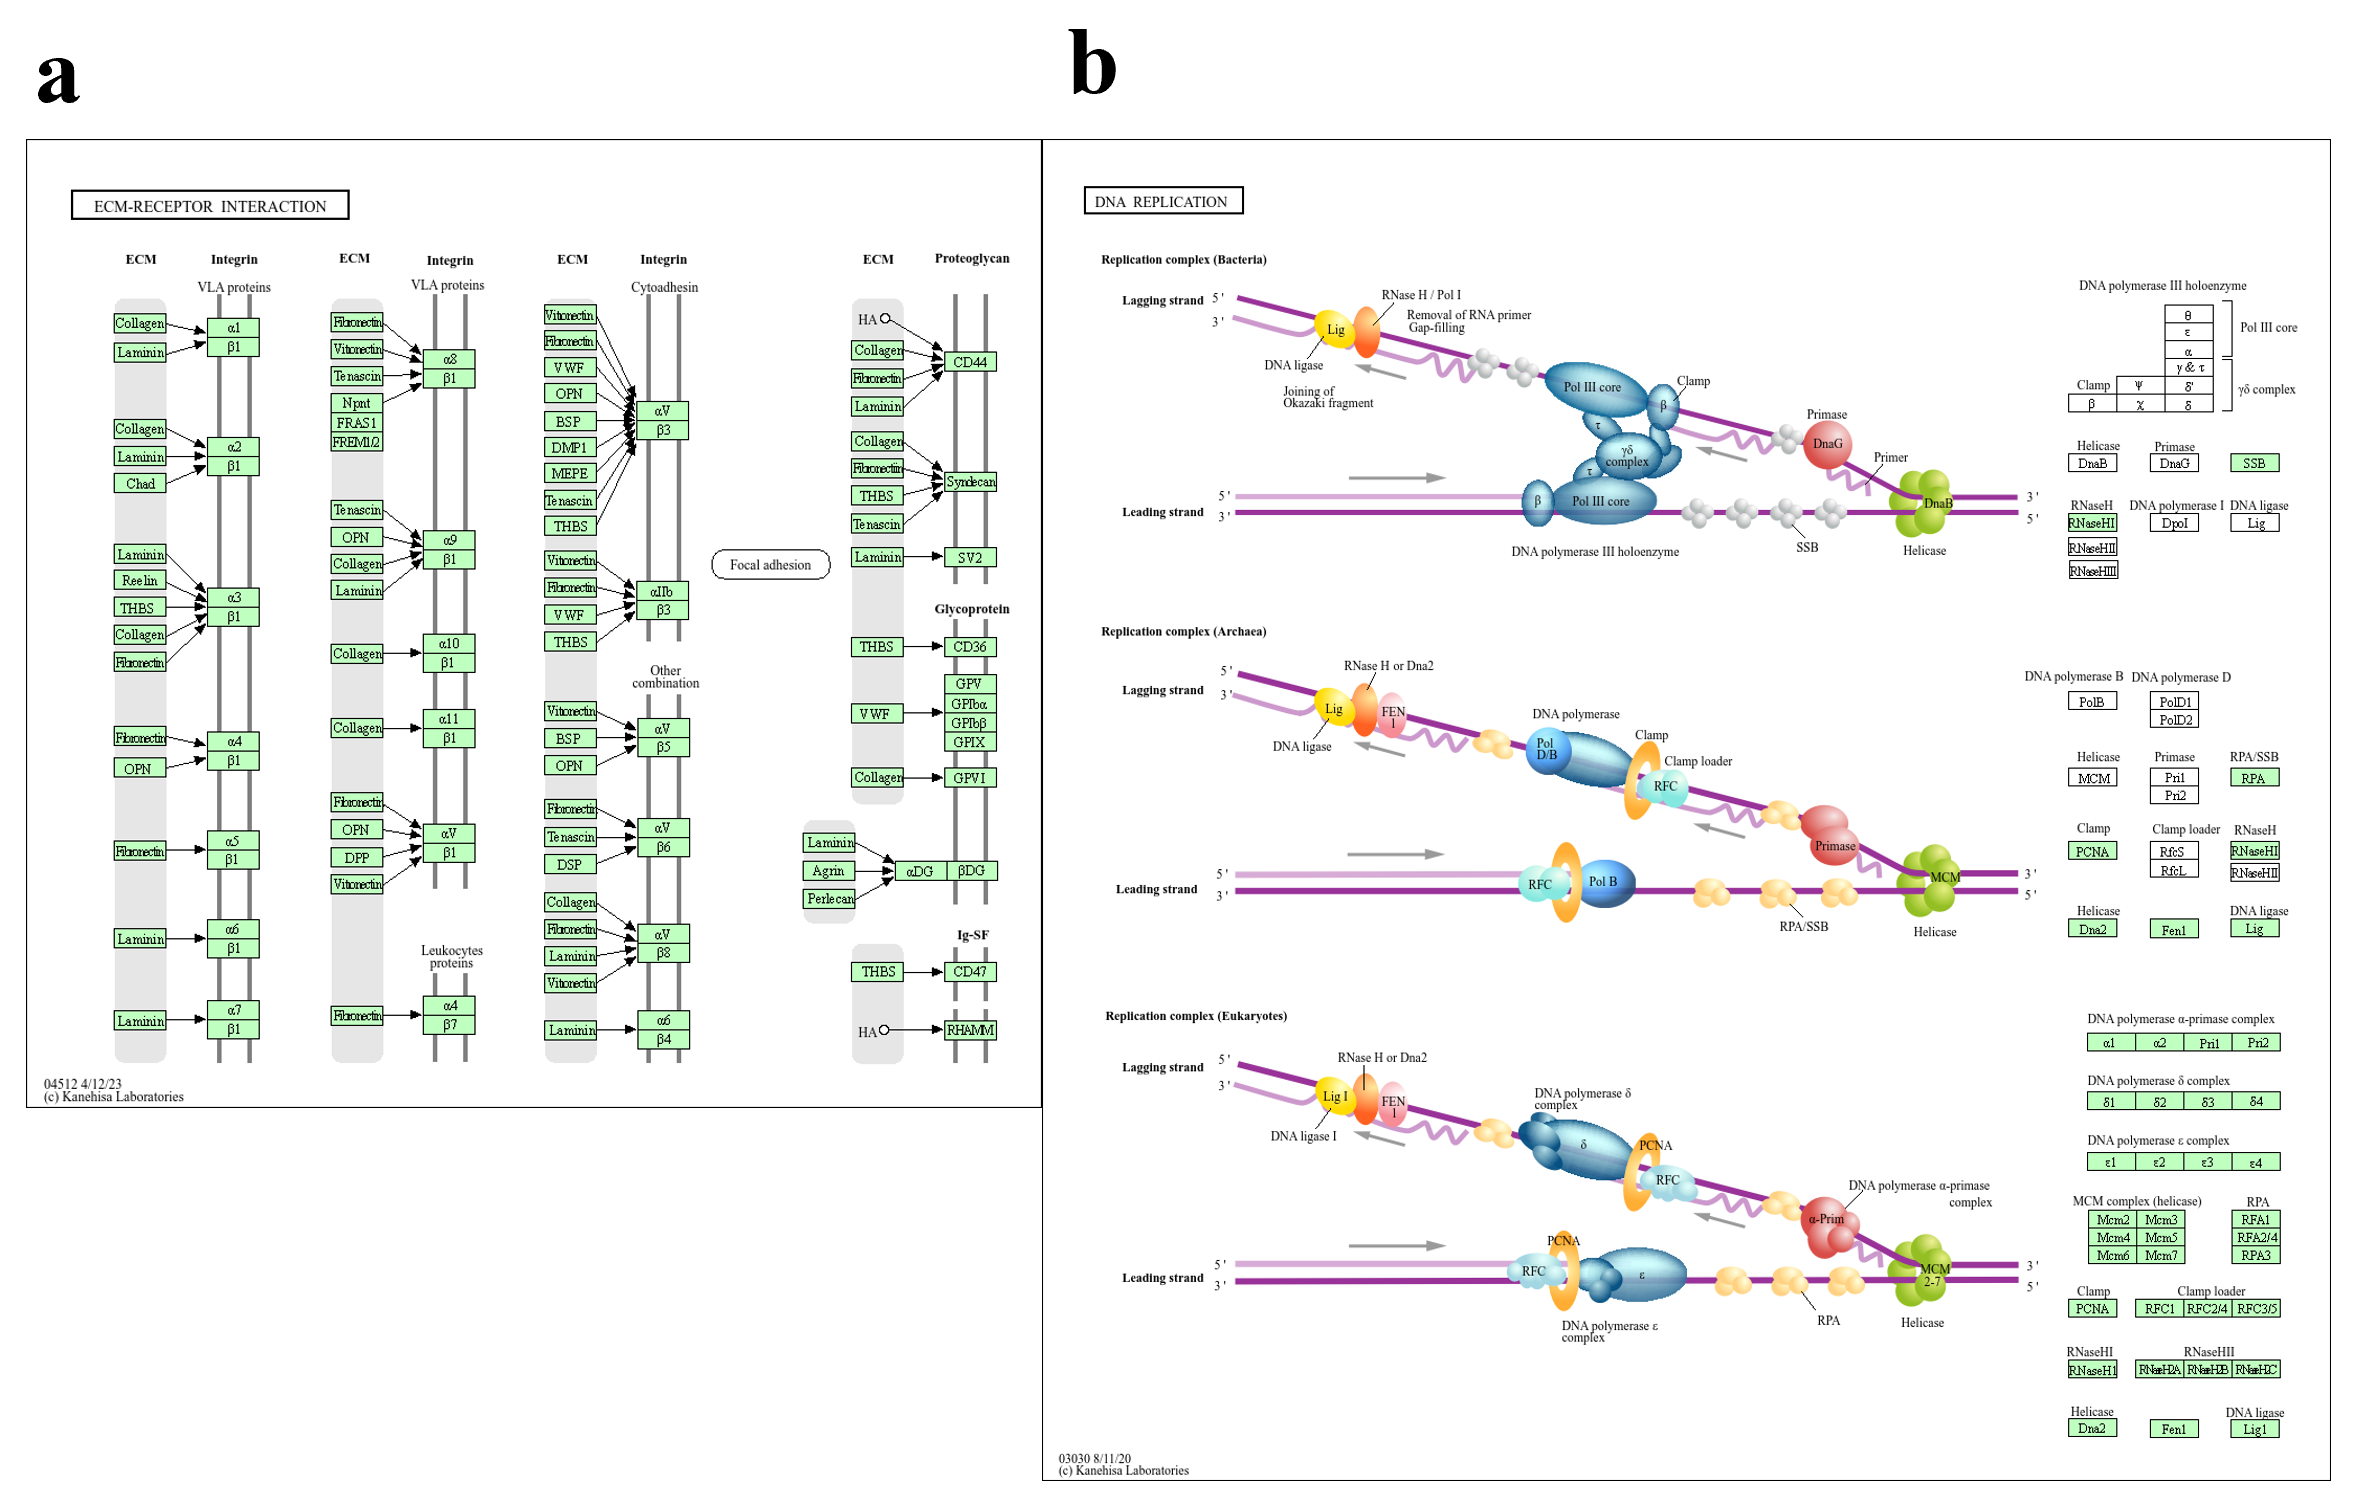


**Additional Fig. 3: KEGG Mapper’s visualisation of** **a)** the KEGG DNA replication pathway and **b)** the KEGG ECM-receptor interaction pathway. Differential genes (Entrez IDs) were mapped to KEGG pathways using KEGG Mapper’s “Search & Color Pathway” tool. Significant genes were submitted as a list to KEGG Mapper, which returned pathway diagrams with the corresponding gene boxes highlighted. These KEGG-provided images were then saved and used for pathway visualization.
