# Supplementary material for: mRNA profiling of mesenchymal stem cell-derived exosomes reveals their function in accelerating wound healing
Source: Research Square preprint supplement (doi:10.21203/rs.3.rs-8130672/v1), 2026-01-19
Supplement: Supplementary file 2 [file 0d4727f612236be744cbff31.docx]

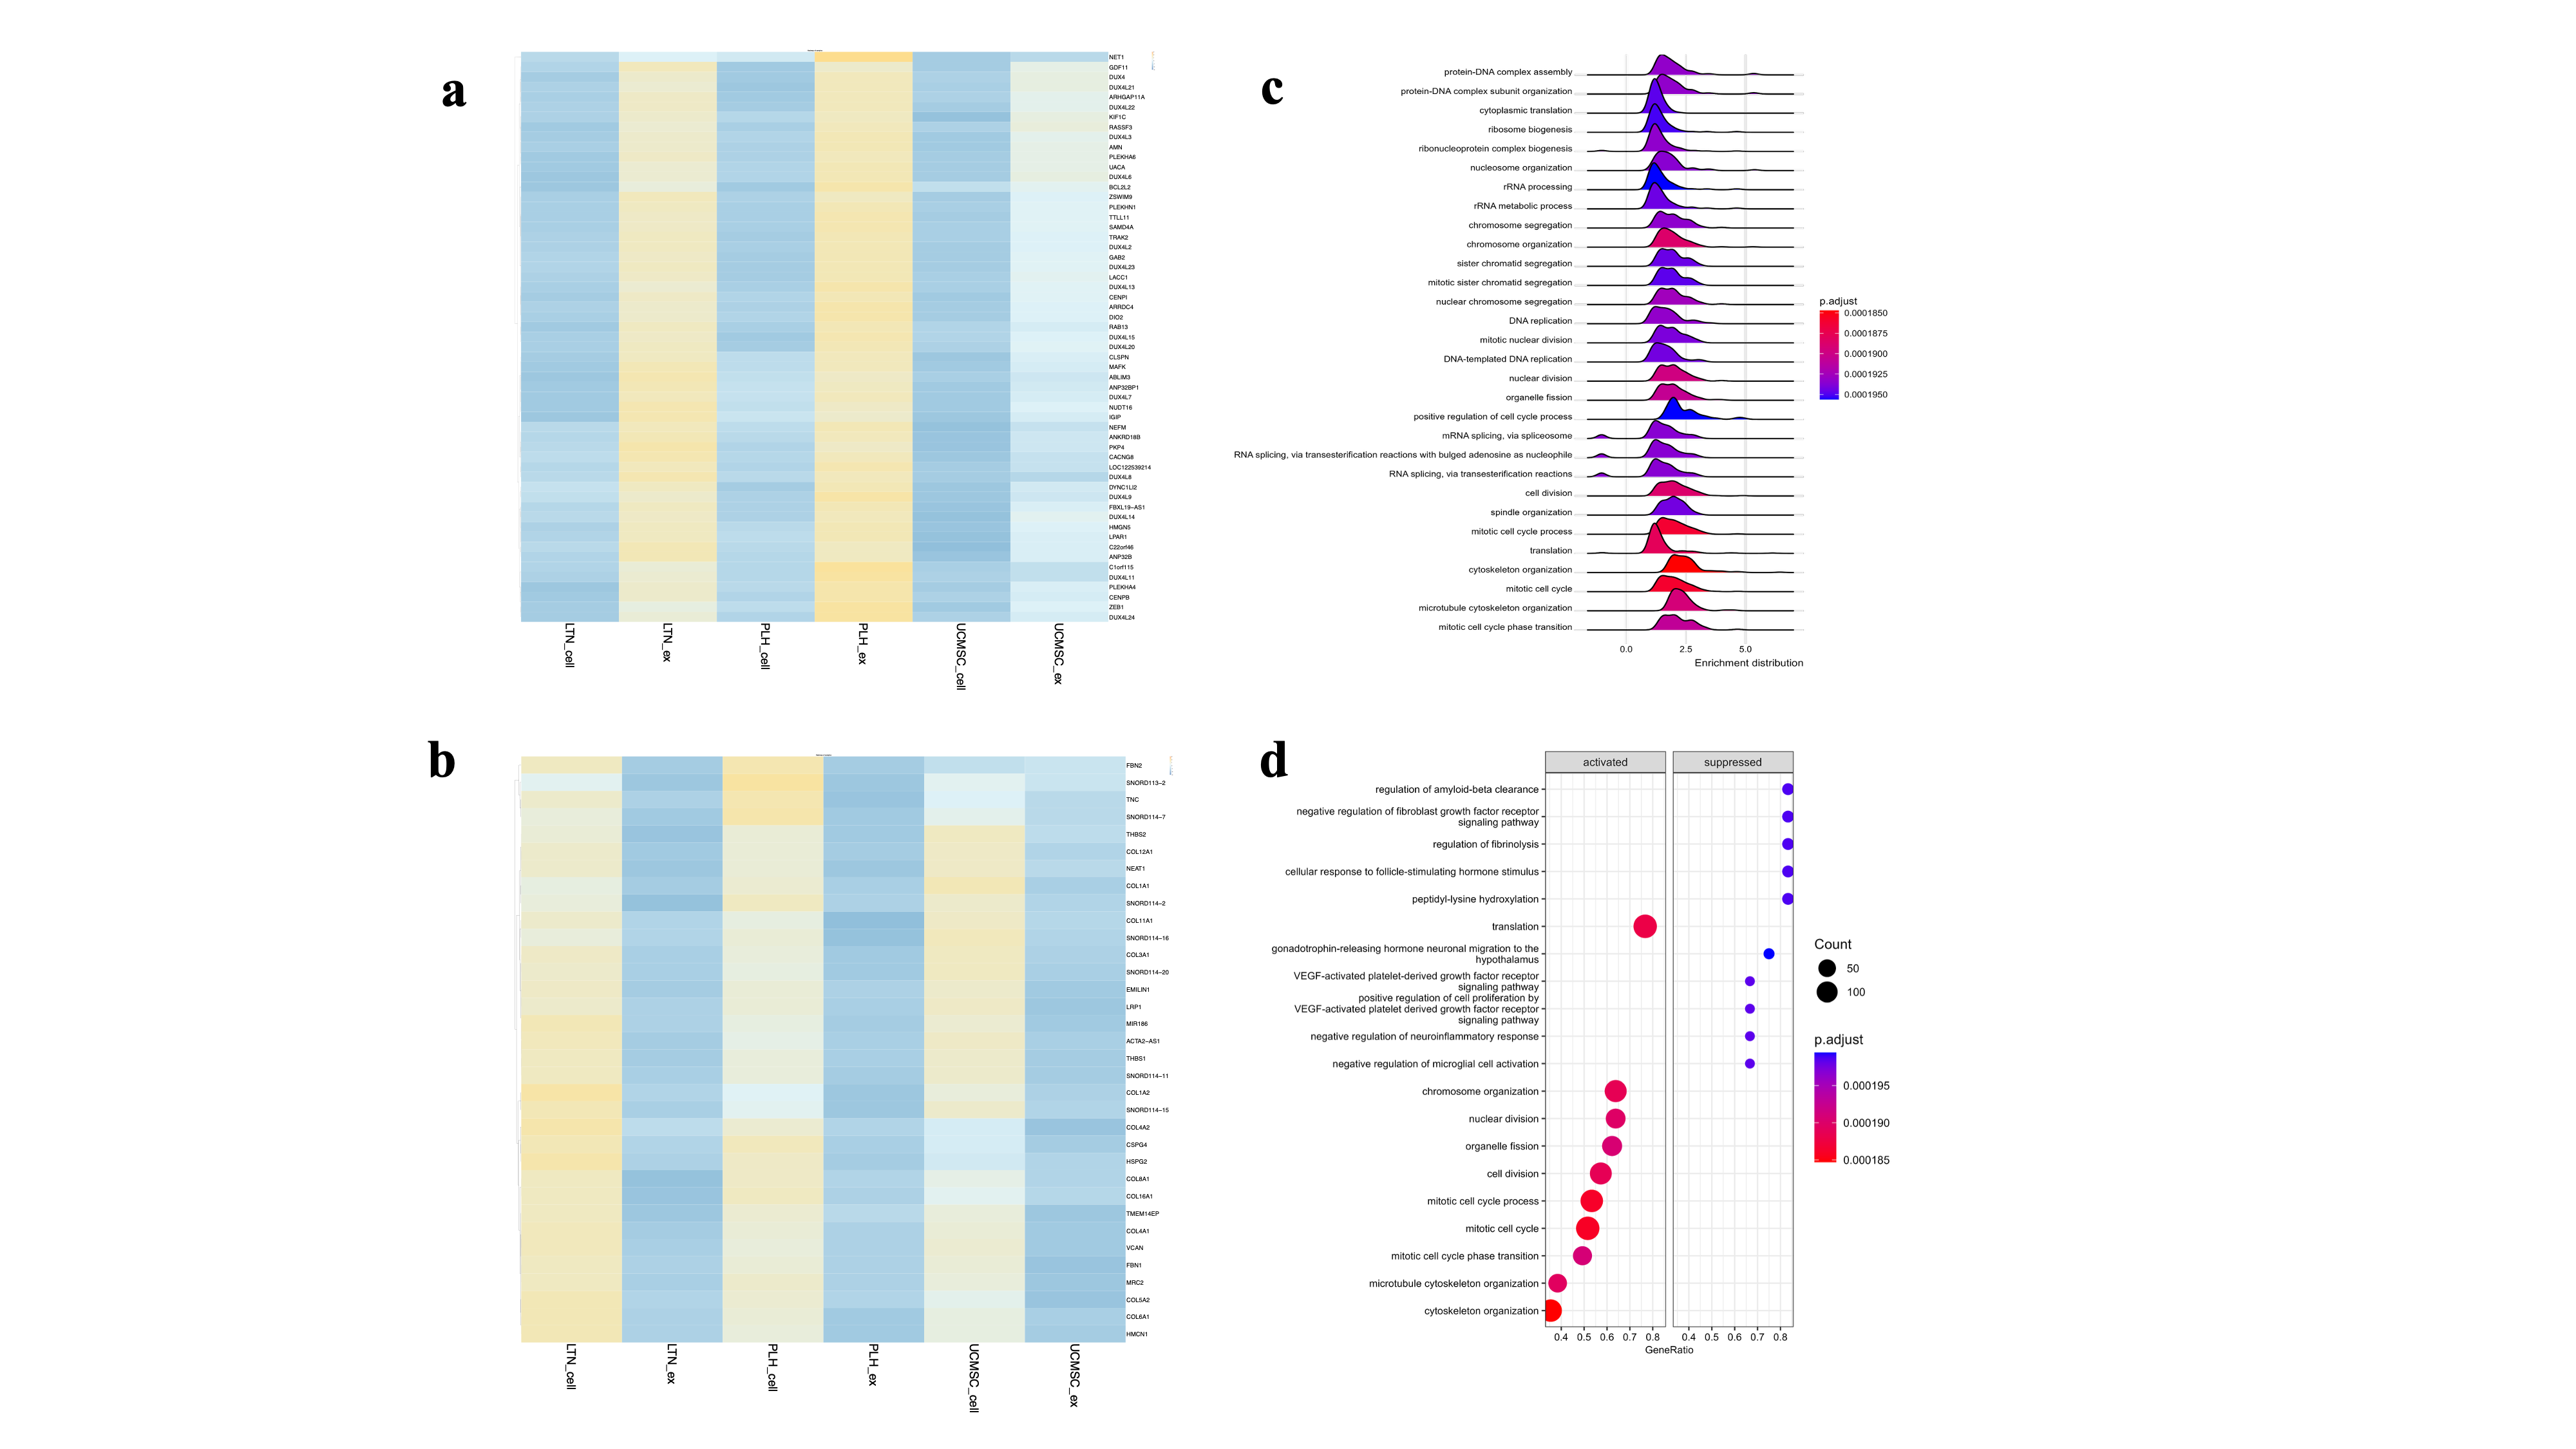


**Additional Fig. 1: Top coding genes that enriched in exosomes.** a) Top coding genes that enriched in exosomes with fold change greater than 4 and b) smaller than -4 (b). c) A ridge plot and d) dot plot indicated differentially enriched pathways generated using the Gene Ontology Biological Process database for the differential genes.
