# Supplementary material for: mRNA profiling of mesenchymal stem cell-derived exosomes reveals their function in accelerating wound healing
Source: Research Square preprint supplement (doi:10.21203/rs.3.rs-8130672/v1), 2026-01-19
Supplement: Supplementary file 3 [file 7f6a80394cc7ee88d8a2a806.docx]

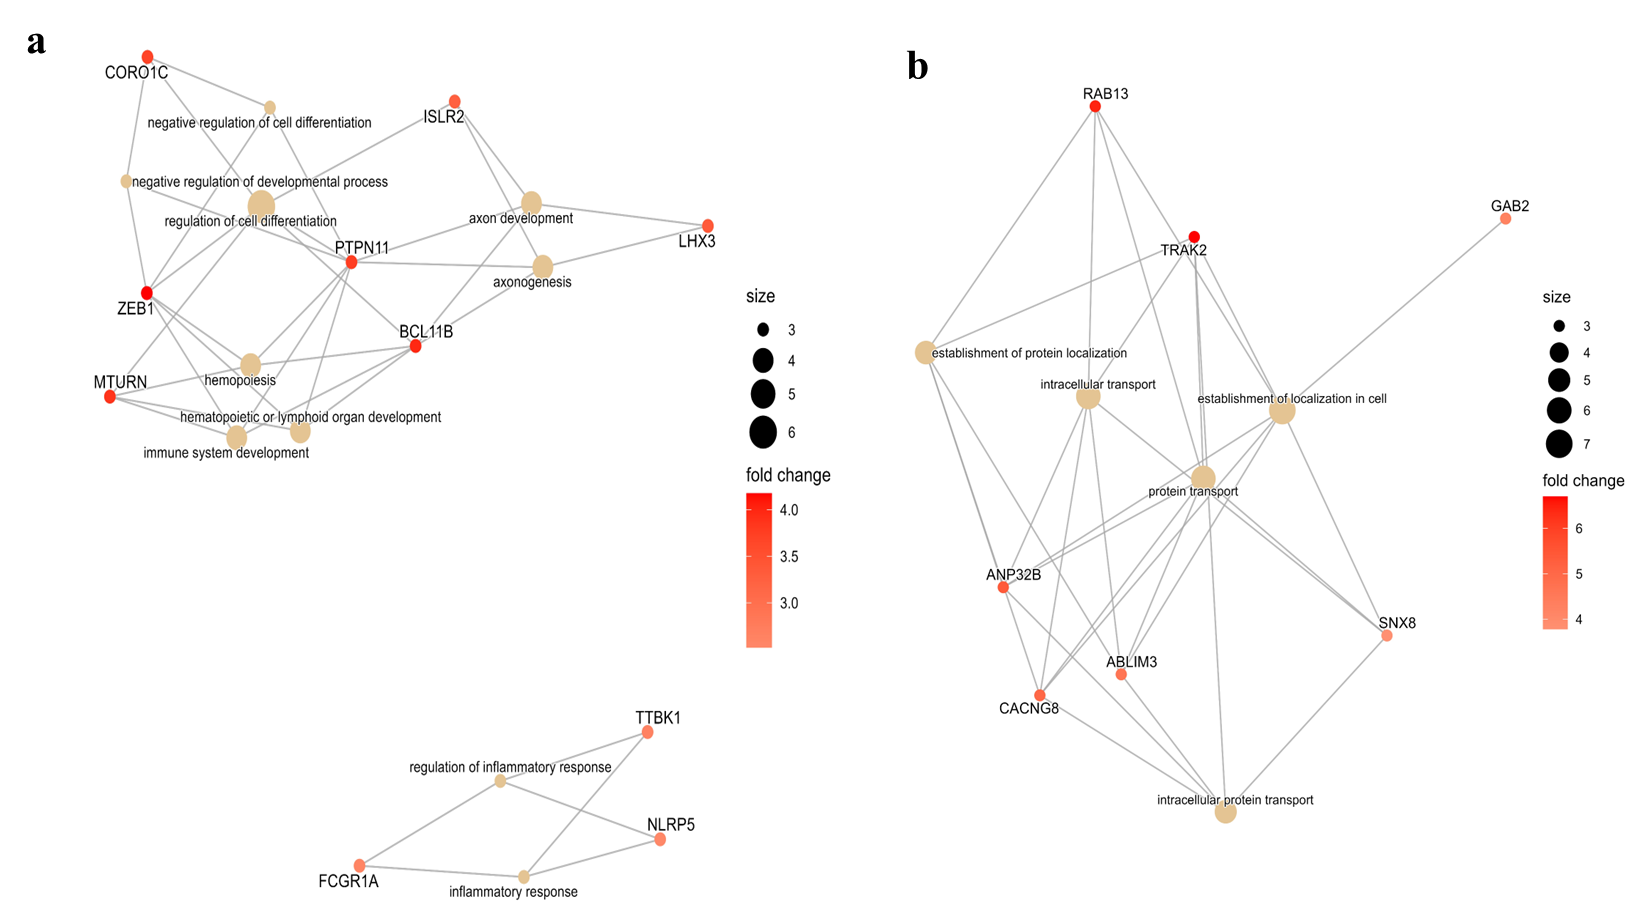


**Additional Fig. 1: Pathway analysis of clusters identified through hierarchical clustering revealed the enrichment of GO processes**. a) GO processes related to organ development and inflammation, which are all key to wound healing and b) GO processes related to intracellular protein transport and localization
