# Supplementary material for: mRNA profiling of mesenchymal stem cell-derived exosomes reveals their function in accelerating wound healing
Source: Research Square preprint supplement (doi:10.21203/rs.3.rs-8130672/v1), 2026-01-19
Supplement: Supplementary file 4 [file a04b20008984f88592b71daa.docx]

|  | Cluster 1 (top right of the HCL map) | Cluster 2 (bottom left of the HCL map) |
| --- | --- | --- |
| Genes in this cluster | USP17L30, UROC1, DUX4L4, TMEM132E, C22orf46, EIF5B, MCF2L, RBP3, SKA3, MAFK, ADAMTS8, KIF1C, TTBK1, ZEB1, AGAP2, ISLR2, ZNF326, OTOP3, TRAF3IP1, NDUFV3, TTC16, BCL11B, ZNF831, VSX2, CA11, DDC, ANXA10, NCAN, DUX4L2, KRT3, CACNA1G, DLGAP2, NLRP5, NBPF26, FOXD4L6, LHX3, ZBTB47, MMEL1, ZWINT, POLR3G, KIF1A, ANKRD18B, CORO1C, KRT17P6, FAM197Y3, FCRLB, DUX4L20, ZNF880, CNGA3, SAP18, DUX4L24, MEFV, KRTAP10−4, USP17L21, TMPRSS13, DUX4L22, XAGE1B, MALL, FCGR1A, DUX4L25, CUX2, FAM197Y6, MYT1L, NOTCH2NLC, ANKRD18A, ECEL1, DIO2, LGALS9B, KRTAP16−1, TP53INP2, MTURN, DUX4L9, ZNF541, CCNE2, TRIM64EP, IQSEC3, HSPA7, WSCD2, USP17L27, ANP32BP1, TAF3, FAM90A18, ARHGAP11A, TMSB15A, SLC22A14, CAMSAP3, PURA, ARHGAP11B, CENPU, GINS2, FAM90A12P, PTPN11, LGI2, OBP2B, CKS1B, SCN4B | DLGAP3, BFSP2, DUX4L7, UACA, RAB13, FAM90A8, CCDC34, ARL9, AIRE, PLEKHN1, SNX8, XAGE1A, KRT85, DBET, PRAMEF11, ANP32A, ABLIM3, WDR43, NKD1, EMX2, NEGR1, DUX4L13, SYNJ2BP, HCN4, FAM90A9, MT2A, TUBB7P, CENPM, TAS1R2, TUBB8P8, TRAK2, PRR20B, ADAMTSL2, PKP4, ANP32B, SETSIP, SEMA5B, TMC2, CENPW, TH, MYLK3, GAB2, FAM219A, CGB5, APOA5, LGALS9C, ABCC8, CFC1, CDCA5, NCL, FFAR3, BIRC5, SLC34A1, CACNG8, TAF15, TERT, USP17L24, HBA1, HBA2, ZNF883, HNRNPA3, GGA2, SYNPO2L, IGIP |

Additional file 1 - Table 1: Genes in clusters identified through hierarchical clustering of top-upregulated genes in UCMSC-derived EXs.
