# Supplementary material for: mRNA profiling of mesenchymal stem cell-derived exosomes reveals their function in accelerating wound healing
Source: Research Square preprint supplement (doi:10.21203/rs.3.rs-8130672/v1), 2026-01-19
Supplement: Supplementary file 5 [file d3657c18aafb7ea010dca758.docx]

Additional file 2 – Table 2: Genes contributed into the network clusters 1 and 2 - the two largest clusters of protein interaction identified from exosome-enriched genes

| Cluster 1 | Cluster 2 |
| --- | --- |
| ANLN, ARHGAP11A, ASF1B, AURKA, AURKB, BIRC5, BRCA1, BTF3, BUB1, BUB1B, CCDC124, CCNA2, CCNB1, CCNB2, CCT2, CCT5, CDC20, CDC25A, CDC25C, CDC45, CDC6, CDCA2, CDCA3, CDCA5, CDCA7, CDCA8, CDK1, CDKN3, CDT1, CENPA, CENPE, CENPF, CENPM, CENPN, CENPU, CEP55, CHAF1A, CKAP2L, CKS1B, CKS2, DEPDC1, DLGAP5, DTL, ECT2, EEF1B2, EIF2S1, EIF5A, EIF5AL1, EIF5B, ETF1, EXO1, EZH2, FAM64A, FAM83D, FANCI, FAU, FBL, FEN1, FOXM1, GINS1, GINS2, GTSE1, HJURP, KIF11, KIF14, KIF15, KIF20A, KIF22, KIF2C, KIF4A, KIFC1, KPNA2, LYAR, MAD2L1, MCM10, MCM2, MCM3, MCM4, MCM5, MCM7, MELK, MRPL1, MRPL11, MRPL13, MRPL15, MRPS11, MRPS14, MRPS15, MRTO4, MYBL2, NACA, NCAPG, NCAPG2, NCAPH, NDC80, NEK2, NHP2, NHP2L1, NSA2, NUF2, ORC1, PA2G4, PABPC1, PBK, PCNA, PLK1, PLK4, POLE2, PRIM1, PTTG1, RACGAP1, RAD51, RAD51AP1, RFC3, RPL10A, RPL12, RPL13, RPL13A, RPL14, RPL15, RPL18A, RPL19, RPL21, RPL22, RPL22L1, RPL23, RPL23A, RPL24, RPL26, RPL26L1, RPL27, RPL27A, RPL28, RPL29, RPL32, RPL34, RPL35, RPL35A, RPL36, RPL37, RPL37A, RPL38, RPL39, RPL5, RPL6, RPL7, RPL7A, RPLP0, RPLP1, RPLP2, RPS10, RPS12, RPS13, RPS14, RPS15, RPS15A, RPS16, RPS18, RPS2, RPS20, RPS21, RPS23, RPS24, RPS25, RPS26, RPS27, RPS27A, RPS28, RPS29, RPS5, RPS6, RPS7, RPS8, RPS9, RPSA, RPSAP58, RRM2, SEC61G, SERBP1, SGOL1, SHCBP1, SKA1, SKA3, SMC4, SPAG5, SPC25, TACC3, TPT1, TPX2 | ATP5C1, ATP5E, ATP5F1, ATP5G1, ATP5G3, ATP5H, ATP5I, ATP5J, ATP5J2, ATP5L, ATP5O, BARD1, COA6, COX5A, COX5B, COX6B1, COX7A2, COX7C, H2AFX, HSP90AA1, ICT1, MRPL17, MRPL20, MRPL27, MRPL33, MRPL40, MRPL41, MRPS18C, MRPS6, MTRF1L, NDUFA12, NDUFA2, NDUFA6, NDUFAB1, NDUFB10, NDUFB2, NDUFB3, NDUFB4, NDUFB6, NDUFC1, NDUFC2, NDUFS5, NDUFS6, NDUFS8, POLR2F, PSMD14, RFC2, RPA2, RPL23L, SDHB, UQCR10. |
